# Supplementary material
Source: PubMed Central journal article supplement (PMC6039090)
Supplement: uin-0100-0470-s05.pdf [file uin-0100-0470-s05.pdf]

**Supplemental table 1.** Clinical data and RQ values of testicular germ cell tumour patients

| Patient ID | Age [years] | S/NS | Tumour size [mm] | RQ miR-371a-3p pre-operative | RQ miR-371a-3p 4 h postop. | RQ miR-371a-3p 8 h postop. | RQ miR-371a-3p 10 h postop. | RQ miR-371a-3p 24 h postop. | RQ miR-371a-3p 48 h postop. | RQ miR-371a-3p 72 h postop. |
|------------|-------------|------|------------------|------------------------------|----------------------------|----------------------------|-----------------------------|-----------------------------|-----------------------------|-----------------------------|
| 1          | 49          | S    | 18               | 20.64                        | n.a                        | n.a.                       | n.a.                        | 0.43                        | 0.0                         | 0.0                         |
| 2          | 34          | S    | 34               | 2035.26                      | n.a                        | n.a.                       | n.a.                        | 48.47                       | 5.79                        | 2.54                        |
| 3          | 31          | S    | 68               | 1728.14                      | n.a                        | n.a.                       | n.a.                        | 108.91                      | 47.28                       | 62.21                       |
| 4          | 28          | NS   | 9                | 12.3                         | n.a                        | n.a.                       | n.a.                        | 0.0                         | 0.0                         | 0.0                         |
| 5          | 53          | S    | 48               | 182.91                       | n.a                        | n.a.                       | n.a.                        | 7.25                        | 0.0                         | 0.0                         |
| 6          | 47          | S    | 8                | 0.0                          | n.a                        | n.a.                       | n.a.                        | 0.0                         | 0.0                         | 0.0                         |
| 7          | 66          | S    | 7                | 58.53                        | n.a                        | n.a.                       | n.a.                        | 1.61                        | 0.0                         | 0.0                         |
| 8          | 41          | S    | 56               | 950.14                       | n.a                        | n.a.                       | n.a.                        | 14.58                       | 4.86                        | 3.12                        |
| 9          | 34          | S    | 47               | 1620.25                      | n.a                        | n.a.                       | n.a.                        | 32.72                       | 9.7                         | 1.94                        |
| 10         | n.a.        | S    | 54               | 4347.59                      | n.a                        | n.a.                       | n.a.                        | 78.79                       | 1.47                        | 5.61                        |
| 11         | 47          | NS   | 14               | 45.86                        | n.a                        | n.a.                       | n.a.                        | 3.92                        | 2.71                        | n.a.                        |
| 12         | 29          | S    | 16               | 54.38                        | n.a                        | n.a.                       | n.a.                        | 0.0                         | 0.0                         | 0.0                         |
| 13         | 47          | NS   | 24               | 354.83                       | n.a                        | n.a.                       | n.a.                        | 39.56                       | 24.61                       | 11.69                       |
| 14         | 52          | S    | 15               | 2.57                         | n.a                        | n.a.                       | n.a.                        | 0.0                         | 0.0                         | 0.0                         |
| 15         | 34          | S    | 15               | 2.29                         | n.a                        | n.a.                       | n.a.                        | 0.0                         | 0.0                         | n.a.                        |
| 16         | 41          | S    | 45               | 607.61                       | n.a                        | n.a.                       | n.a.                        | 14.18                       | 2.1                         | 0.63                        |
| 17         | 33          | S    | 44               | 712.63                       | n.a                        | n.a.                       | n.a.                        | 22.53                       | 18.8                        | 4.37                        |
| 18         | 39          | S    | 62               | 919.69                       | n.a                        | n.a.                       | n.a.                        | 2.4                         | 0.89                        | 0.41                        |
| 19         | 60          | S    | 31               | 71.11                        | n.a                        | n.a.                       | n.a.                        | 0.0                         | 0.0                         | 0.0                         |
| 20         | 57          | S    | 40               | 101.83                       | n.a                        | n.a.                       | n.a.                        | 4.59                        | 5.71                        | n.a.                        |
| 21         | 34          | S    | 32               | 282.09                       | n.a                        | n.a.                       | n.a.                        | 14.44                       | 3.84                        | 0.46                        |
| 22         | 62          | S    | 35               | 1081.69                      | 941.63                     | 409.07                     | n.a.                        | 17.47                       | 22.76                       | n.a.                        |
| 23         | 35          | S    | 14               | 45.8                         | n.a                        | n.a.                       | 0.82                        | 0.0                         | 0.0                         | n.a.                        |
| 24         | 27          | NS   | 16               | 154.07                       | 70.13                      | n.a.                       | n.a.                        | 5.2                         | 2.12                        | n.a.                        |

NS: Nonseminoma; S: Seminoma; RQ: Relative quantity; n.a.: not available

**Supplemental table 2.** Clinical data and RQ values of controls

| Control ID | Age [years] | RQ miR-371a-3p |
|------------|-------------|----------------|
| 1          | 52          | 0.0            |
| 2          | 26          | 0.0            |
| 3          | 28          | 0.0            |
| 4          | 23          | 0.0            |
| 5          | 43          | 0.0            |
| 6          | 18          | 1.58           |
| 7          | 49          | 0.0            |
| 8          | 36          | 0.0            |
| 9          | 18          | 0.0            |
| 10         | 33          | 0.0            |
| 11         | 18          | 0.37           |
| 12         | 22          | 0.0            |
| 13         | 50          | 2.78           |
| 14         | 24          | 0.0            |
| 15         | 22          | 0.0            |
| 16         | 33          | 1.47           |
| 17         | 47          | 0.36           |
| 18         | 54          | 0.0            |
| 19         | 54          | 0.0            |
| 20         | 48          | 1.16           |

RQ: Relative quantity
