# Supplementary material
Source: PubMed Central journal article supplement (PMC6039090)

**Relative miR-371a-3p expression**

10000  
1000  
100  
10  
1  
0

Pre-op

24 h

48 h

72 h

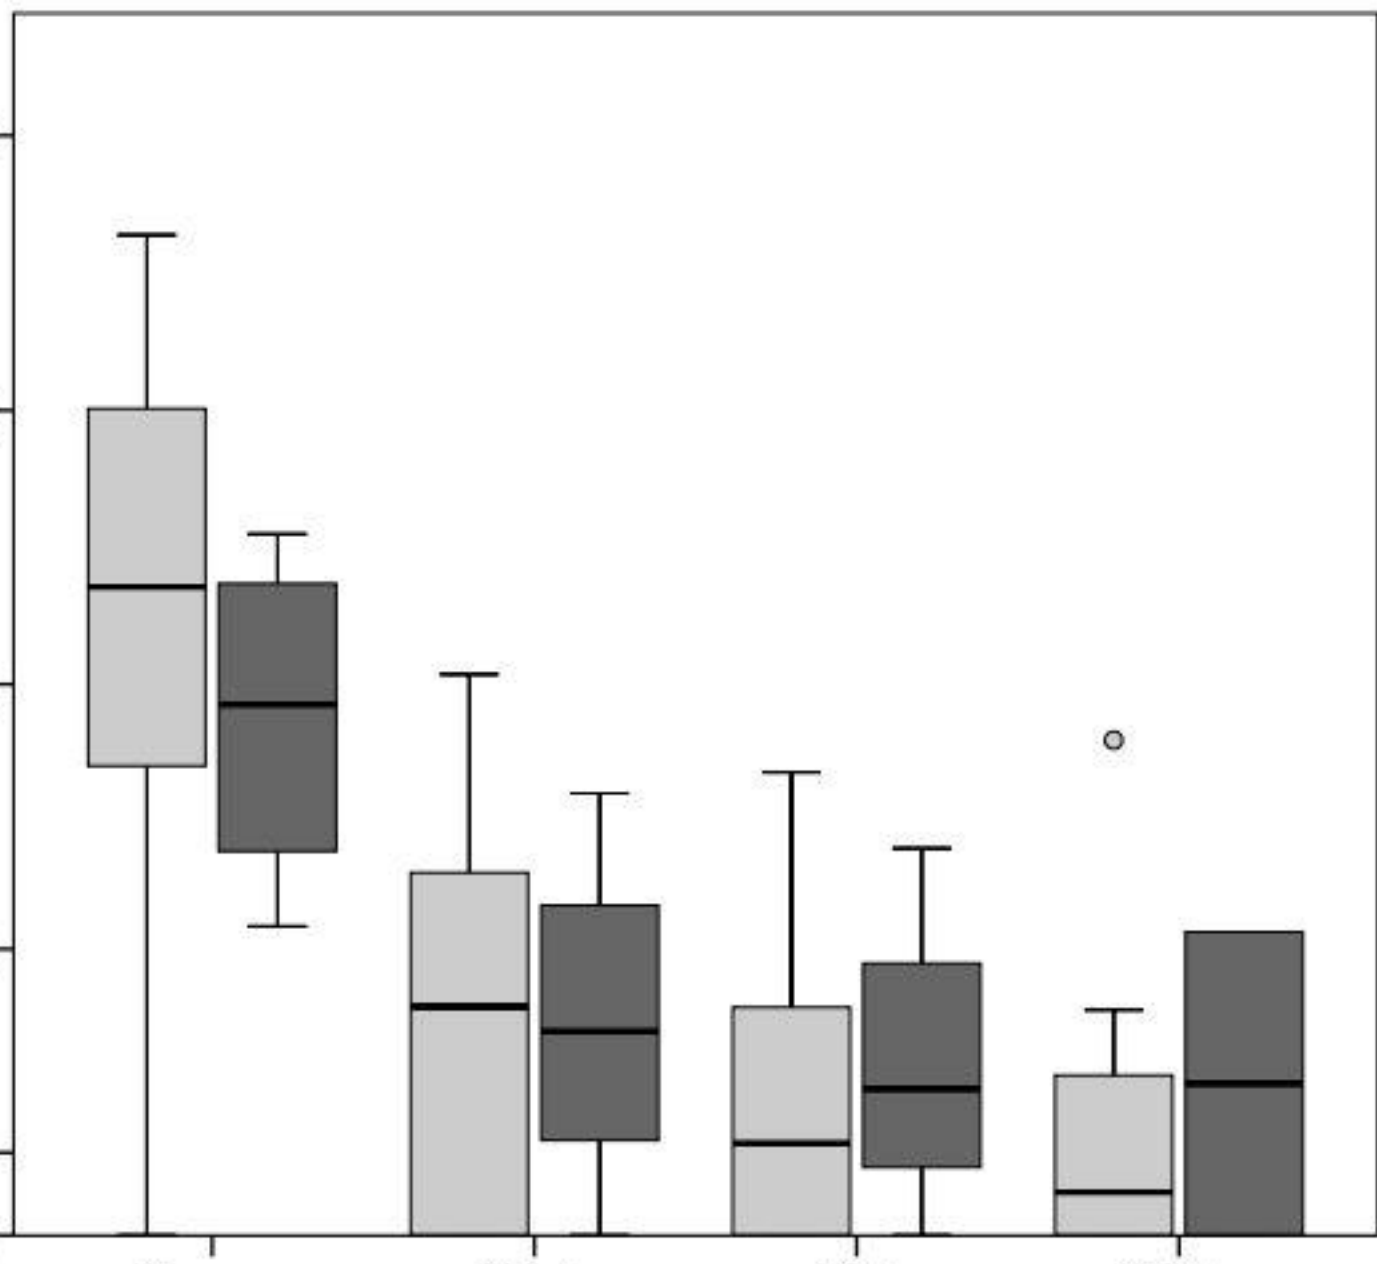

Supplement: uin-0100-0470-s06.pdf [file uin-0100-0470-s06.pdf]

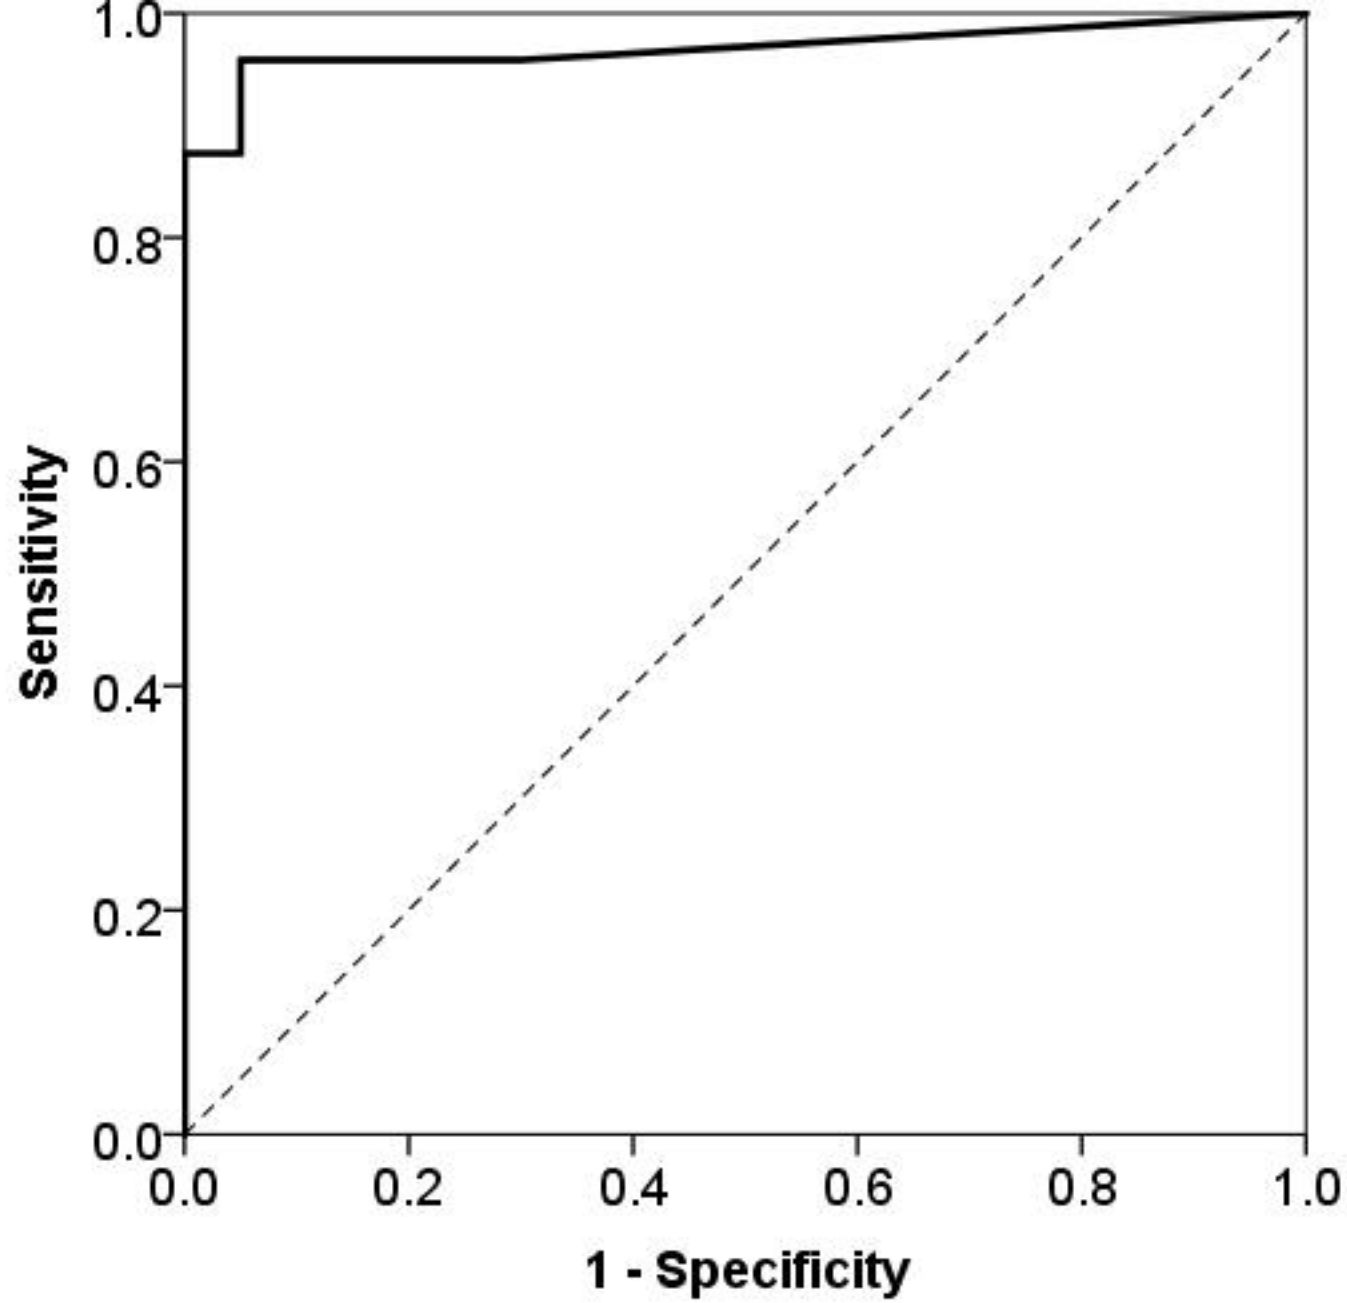

Supplement: uin-0100-0470-s07.pdf [file uin-0100-0470-s07.pdf]
